# Supplementary material for: A distinct sortase SrtB anchors and processes a streptococcal adhesin AbpA with a novel structural property
Source: PubMed Central journal article supplement (PMC4974636; doi:10.1038/srep30966), 2016-08-05

1 **Supplementary Information**

2 **A distinct sortase SrtB anchors and processes a streptococcal adhesin**

3 **AbpA with a novel structural property**

4 Xiaobo Liang<sup>a,1,2</sup>, Bing Liu<sup>b,1</sup>, Fan Zhu<sup>a,1</sup>, Frank A. Scannapieco<sup>c</sup>, Elaine M  
5 Haase<sup>c</sup>, Steve Matthews<sup>b\*</sup> and Hui Wu<sup>a\*</sup>

6 <sup>a</sup>Departments of Pediatric Dentistry and Microbiology, University of Alabama  
7 at Birmingham School of Dentistry, Birmingham, AL , USA; <sup>b</sup>Department of  
8 Life Sciences, Imperial College London, London, UK; <sup>c</sup>Department of Oral  
9 Biology, University at Buffalo, Buffalo, NY, USA

10 **Key words:** sortase, amylase binding protein A, LPXTG motif,  
11 streptococcus

12 **Running Title:** New sortase and adhesin substrate system

13  
14  
15  
16 <sup>1</sup> These three authors contribute equally to the manuscript

17 <sup>2</sup> Present Address: Yunnan Institute of Food Safety, Kunming University of  
18 Science and Technology, Kunming, Yunnan, China.

19 \* To whom correspondence should be addressed. E-mail: [hwu@uab.edu](mailto:hwu@uab.edu) or  
20 [s.j.matthews@imperial.ac.uk](mailto:s.j.matthews@imperial.ac.uk)

## 1 **Methods**

### 2 **Bacterial strains, plasmids and growth conditions**

3 The bacterial strains and plasmids used in this study are listed in SI Table 1.

4 *Escherichia coli*, *S. parasanguinis* and *S. gordonii* strains were cultured in the  
5 growth conditions described previously<sup>1</sup>. For bacterial growth, 100 µg ml<sup>-1</sup>  
6 ampicillin, 50 µg ml<sup>-1</sup> kanamycin or 300 µg ml<sup>-1</sup> erythromycin were used in *E.*  
7 *coli*, 125 µg ml<sup>-1</sup> kanamycin or 5 µg ml<sup>-1</sup> erythromycin were used in *S.*  
8 *parasanguinis*, 1 mg ml<sup>-1</sup> kanamycin or 5 µg ml<sup>-1</sup> erythromycin were used in *S.*  
9 *gordonii*.

### 10 ***Molecular cloning techniques***

11 *E. coli* plasmid DNA was isolated using the mini-prep DNA preparation kit  
12 (Qiagen). The genomic DNA of *S. parasanguinis* and *S. gordonii* were  
13 extracted using the Puregene DNA isolation kit (Gentra System). Polymerase  
14 chain reaction (PCR) was performed with KOD hot start DNA polymerase  
15 (Novagen), using the GeneAmp PCR system 9700 (PE Applied Biosystems).  
16 Primers used for the amplification of DNA fragments are listed in SI Table 2.  
17 Restriction enzymes and T4 DNA ligase (New England Biolabs) were used  
18 according to the manufacturer's instructions. Competent *E. coli* cells were  
19 prepared and transformed by standard techniques <sup>2</sup>. *S. parasanguinis* was  
20 transformed by electroporation using a gene pulser (Bio-Rad Laboratories) as  
21 described previously<sup>3</sup>. *S. gordonii* was transformed by natural transformation  
22 method <sup>4</sup>.

### 23 **Construction of *srtA* and *srtB* mutants and complementation strains in** 24 ***S. parasanguinis***

1 The allelic replacement strategy was used in *srtA* and *srtB* mutagenesis. *srtA*  
2 and *srtB* and their flanking regions were amplified from *S. parasanguinis*  
3 FW213 genomic DNA by PCR with primer pairs *srtA*-F1/*srtA*-R1 and *srtB*-  
4 F1/*srtB*-R1, respectively. PCR products were cloned into *Hind*III and *Xho*I  
5 digested and end-blunted pSU21<sup>7</sup>, yielding pBYL12 (containing *srtA*) and  
6 pBYL11 (containing *srtB*) respectively. Inverse PCR with two primer pairs of  
7 *srtA*-F2/*srtA*-R2 and *srtB*-F2/*srtB*-R2, in each of which the *Bgl*II and *Bam*HI  
8 enzyme sites were introduced. The resulting DNA fragments were digested  
9 with *Bgl*II or *Bam*HI and ligated with the *Bam*HI digested erythromycin  
10 resistance gene fragment to generate pBYL16 and pBYL17, respectively.  
11 These plasmids were transformed into *S. parasanguinis* FW213 and the  
12 erythromycin resistance transformants BYL32 and BYL31 were isolated,  
13 confirmed by colony PCR and were used in the study.

14 The *srtB* complement strain was constructed using plasmid pDL276.  
15 Briefly, the full length *srtB* gene was amplified from *S. parasanguinis* using the  
16 primer pair *srtB*-F3/*srtB*-R3, in which *Sac*I and *Sph*I were introduced. The  
17 PCR product was digested with *Sac*I and *Sph*I and was inserted into same  
18 enzymes digested pDL276, yielding plasmid pBYL37. This plasmid was  
19 transformed into BYL31 and the colonies resistant to both kanamycin and  
20 erythromycin were confirmed and named as BYL37.

### 21 **Construction of *srtB* mutant and complementation strains in *S. gordonii***

22 A 2202-bp PCR fragment of *srtB* was amplified from *S. gordonii* using the  
23 primer pair, *srtB*-F1g/*srtB*-R1g, and then cloned into the pGEM-T easy vector.  
24 The resulting construct was used as template, inverse PCR were performed  
25 with the primer pair *srtB*-F2g/*srtB*-R2g, in which *Hind*III site was introduced.  
26 The resulting PCR product was digested with *Hind*III and ligated in-frame with  
27 a same enzyme digested promoterless kanamycin resistance cassette *aphA3*  
28 to generate the plasmid pAL824. Through the inverse PCR, a 531-bp DNA

1 fragment which coding the 16-193 amino acids of SrtB protein was deleted.  
2 This plasmid was used to transform *S. gordonii* and the kanamycin resistance  
3 transformants were isolated, confirmed by PCR and sequence analyses and  
4 was named as AL825.

5 The complement strain was constructed using pVPT-gfp vector. *srtB* gene  
6 was PCR amplified from the genomic DNA of *S. gordonii*, using the primer pair  
7 *srtB*-F3g/*srtB*-R3g with engineered *Sal*I and *Bam*HI restriction enzyme sites.  
8 The PCR product was digested with *Sal*I and *Bam*HI, and cloned into pVPT-  
9 *gfp*<sup>8</sup> to generate pAL826. This plasmid was transformed into the *abpA* mutant  
10 AL825 to construct complemented strains AL827.

### 11 **Cross-complementation of *srtB* mutation between *S. parasanguinis* and** 12 ***S. gordonii***

13 To test if the SrtB from *S. parasanguinis* is functional in *S. gordonii* and vice  
14 versa, two cross-complementation strains were constructed. The *S. gordonii*  
15 *srtB* was amplified with the primer pair *srtB*-F4g/*srtB*-R4g and was cloned into  
16 pDL276. The resulting plasmid (pAL828) was transformed into *S.*  
17 *parasanguinis* mutant BYL31 to generate AL829. Similarly, the *S.*  
18 *parasanguinis srtB* was amplified with the primer pair *srtB*-F4/*srtB*-R4 and was  
19 cloned into pVPT-*gfp*. The resulting plasmid (pAL830) was transformed into *S.*  
20 *gordonii* mutant AL825 to generate AL831. AL829 and AL831 were used in  
21 amylase binding assays.

### 22 **Functional study of SrtB of *S. aureus* and *S. pneumoniae***

23 For the in vivo studies, two *srtB* cross complementation strains were  
24 constructed. Briefly, *srtB* was amplified by PCR from *S. aureus* COL and *S.*  
25 *pneumoniae* Tigr4 genome respectively using the primer pairs of *srtB*-  
26 F1c/*srtB*-R1c and *srtB*-F1t/*srtB*-R1t. The PCR products were digested with  
27 *Sph*I/*Eco*RI and ligated with pDL276. The resulting plasmids (pAL829 and

1 pAL831) were transformed into *S. parasanguinis* *srtB* mutant to generate two  
2 cross-complementation strains, AL838 and AL839. The strains were used in  
3 amylase binding assays.

4 For the in vitro studies, two recombinant SrtB proteins were expressed in *E.*  
5 *coli*. Primer pair of *srtB*-F2c/*srtB*-R2c and *srtB*-F2t/*srtB*-R2t was used in PCR  
6 to amplify *srtB* from *S. aureus* COL and *S. pneumoniae* Tigr4 genome  
7 respectively. The PCR product was digested with *Bam*HI/*Sac*I and ligated with  
8 pET28a-sumo, and the resulting plasmids were transformed into *E. coli* BLR.  
9 Recombinant SrtB were expressed, purified and used in the enzymatic assay  
10 with the recombinant AbpA as a substrate.

### 11 **Construction of *abpA* deletion mutants and site-directed mutants in *S.*** 12 ***parasanguinis***

13 Using *abpA*-F3 as a forward primer, in combination with different reverse  
14 primers, deletion and site-directed mutation alleles for the conserved C-  
15 terminal cell wall sorting signal motif of AbpA were generated by PCR  
16 amplification. The primers used are listed in SI Table2. The PCR products  
17 were digested with *Sal*I and *Kpn*I, ligated with same enzymes digested pVPT-  
18 *gfp*, yielding the mutation plasmids. These plasmids were then transformed  
19 into the *abpA* mutant strain AL821. The resulting strains were used in amylase  
20 binding assays.

### 21 **Preparation of polyclonal antibody against AbpA**

22 1.0 mg of the purified AbpA of *S. parasanguinis* was used to generate  
23 polyclonal antisera in rabbit by Cocalico Biologicals, Inc (Reamstown, PA,  
24 USA). The titer and the specificity of the antiserum to AbpA were tested by  
25 ELISA and western blot analysis, respectively.

### 26 **Construction of AbpA-GFP swap strains in *S. parasanguinis***

1 Using pAL822 as a template, we performed inverse PCR with a forward  
2 primer abpA-F and three different abpA-R primers (abpA-R1, -R2 and -R3  
3 designed for swap1, 2 and 3 construct respectively), in which the *SphI* and  
4 *XhoI* sites were introduced. At the same time *gfp* was amplified from pVPT-gfp  
5 with the primer pair gfp-F/gfp-R which also contains *SphI* and *XhoI* sites. Both  
6 PCR products were digested with *SphI* and *XhoI* and ligated together to  
7 produce plasmid pAL834 and its variants, in which the *gfp* gene was inserted  
8 between the coding sequence of the N-terminal signal peptide and the C-  
9 terminal cell wall anchor motif of AbpA. These plasmids were transformed into  
10 *S. parasanguinis* to obtain AbpA-GFP swap strains, Swap1, Swap2 and  
11 Swap3. Another strain (SP-GFP) in which GFP was fused only with the N-  
12 terminal conserved domain of AbpA. This strain was constructed similarly and  
13 used as a control.

#### 14 **In vitro enzyme activity assay of SrtB**

15 Recombinant AbpA, AbpA-His or AbpA-Gfp and SrtB or SrtB-His were  
16 incubated together in 37°C for 1 h and then probed with anti-AbpA or anti-His  
17 to detect cleavage during the reaction. The resulting AbpA peptides were  
18 identified with Mass Spectrometric analyses and N-terminal amino acid  
19 sequencing (University of Texas Medical Branch Biomolecular Resource  
20 Facility).

#### 21 **SDS-PAGE and Western blot analysis**

22 Protein samples were separated on 10% SDS-polyacrylamide gel and then  
23 stained with Coomassie blue staining R-250. For Western blot analysis, the  
24 separated proteins were transferred to nitrocellulose membranes. The  
25 membranes were blocked by 5% skimmed milk in PBS for 1 h prior to probing

1 with AbpA and other antibodies diluted at 1:2000 in PBS with 0.1% Tween-20.  
2 Horseradish peroxidase-conjugated anti-rabbit and ECL Western blot  
3 detection reagents (GE Healthcare) were used to detect AbpA and other  
4 proteins.

## 5 **Figure Legends**

6 **Supplementary Figure S1.** Conservation and uniqueness of AbpA. **A.**

7 Comparison of *abpA-srtB* gene locus among different oral streptococcal  
8 species. **B.** Alignment of deduced protein sequence of AbpA homologs. The  
9 N-terminal and C-terminal conserved motifs were marked by black rectangle.

10 Secondary structure is shown above the alignment;  $\beta$ -strands ( $\beta$ 1-3) are  
11 colored as yellow arrows and the five helices ( $\alpha$ 1-5) as red rectangles. **C.**

12 Schematic representation of typical CWSS and C terminus of AbpA. +,  
13 positively charged tail.

14

15 **Supplementary Figure S2.** NMR titration of AbpA with amylase. **A.**  $^1\text{H}$ - $^{15}\text{N}$

16 HSQC spectra of *S. parasanguinis* AbpA collected in the absence (left) and  
17 presence (middle - 0.5 molar ration and right - 1 molar ratio) of human  $\alpha$ -

18 amylase. **B.** Amylase titration for mutant AbpA variants.  $^1\text{H}$ - $^{15}\text{N}$  HSQC spectra

19 of *S. parasanguinis* AbpA mutant proteins collected in the absence (black) and  
20 presence (red) of a 5-fold excess of human  $\alpha$ -amylase. From left to right:

21 KK37/38A, YY132/133A and VL117/118A.

22

1 **Supplementary Table S1.** Bacterial strains and plasmids used in this study.

| Strain or plasmid       | Relevant characteristics                                                                                                                                                                                                  | Reference or source |
|-------------------------|---------------------------------------------------------------------------------------------------------------------------------------------------------------------------------------------------------------------------|---------------------|
| Strains                 |                                                                                                                                                                                                                           |                     |
| <i>E. coli</i>          |                                                                                                                                                                                                                           |                     |
| Top10                   | F <sup>-</sup> <i>mcrA</i> Δ( <i>mrr-hsdRMS-mcrBC</i> )<br>φ80 <i>lacZ</i> ΔM15 Δ <i>lacX74 nupG recA1 araD139</i><br>Δ( <i>ara-leu</i> )7697 <i>galE15 galK16 rpsL</i> (Str <sup>r</sup> )<br><i>endA1 λ<sup>-</sup></i> | Invitrogen          |
| BLR(DE3)                | F <sup>-</sup> <i>ompT hsdS<sub>B</sub></i> (r <sub>B</sub> <sup>-</sup> m <sub>B</sub> <sup>-</sup> ) <i>gal dcm</i> (DE3)<br>Δ( <i>srl – recA</i> )306::Tn10 (Tet <sup>r</sup> ).                                       | Novagen             |
| BL21(DE3)               | <i>huA2 [lon] ompT gal</i> (λ DE3) [ <i>dcm</i> ]<br>Δ <i>hsdS λ DE3 = λ sBamHlo ΔEcoRI-B</i><br><i>int::(lacI::PlacUV5::T7 gene1) i21 Δnin5</i>                                                                          | NEB                 |
| AL832                   | BLR(DE3) with pAL832 plasmid; Kan <sup>r</sup>                                                                                                                                                                            | This study          |
| AL833                   | BLR(DE3) with pAL833 plasmid; Kan <sup>r</sup>                                                                                                                                                                            | This study          |
| AL840                   | BL21(DE3) with pAL840 plasmid; Kan <sup>r</sup>                                                                                                                                                                           | <sup>9</sup>        |
| AL841                   | BL21(DE3) with pAL841 plasmid; Kan <sup>r</sup>                                                                                                                                                                           | This study          |
| AL842                   | BL21(DE3) with pAL842 plasmid; Kan <sup>r</sup>                                                                                                                                                                           | This study          |
| AL843                   | BL21(DE3) with pAL843 plasmid; Kan <sup>r</sup>                                                                                                                                                                           | This study          |
| AL844                   | BL21(DE3) with pAL844 plasmid; Kan <sup>r</sup>                                                                                                                                                                           | This study          |
| AL845                   | BL21(DE3) with pAL845 plasmid; Kan <sup>r</sup>                                                                                                                                                                           | This study          |
| AL846                   | BL21(DE3) with pAL846 plasmid; Kan <sup>r</sup>                                                                                                                                                                           | This study          |
| <i>S. parasanguinis</i> |                                                                                                                                                                                                                           |                     |
| FW213                   | <i>S. parasanguinis</i> parent strain                                                                                                                                                                                     | <sup>10</sup>       |
| AL821                   | FW213 <i>abpA::aphA3</i> ; Kan <sup>r</sup>                                                                                                                                                                               | This study          |
| AL823                   | FW213 <i>abpA::aphA3::pAL822</i> ; Kan <sup>r</sup> , Em <sup>r</sup>                                                                                                                                                     | This study          |
| BYL31                   | FW213 <i>srtB::emr</i> , Em <sup>r</sup>                                                                                                                                                                                  | This study          |
| BYL32                   | FW213 <i>srtA::emr</i> , Em <sup>r</sup>                                                                                                                                                                                  | This study          |
| BYL37                   | FW213 <i>srtB::emr::pBYL37</i> ; Em <sup>r</sup> , Kan <sup>r</sup>                                                                                                                                                       | This study          |
| AL829                   | FW213 <i>srtB::emr::pAL828</i> ; Em <sup>r</sup> , Kan <sup>r</sup>                                                                                                                                                       | This study          |
| AL835                   | FW213::pAL834; Em <sup>r</sup>                                                                                                                                                                                            | This study          |
| AL837                   | FW213::pAL836; Em <sup>r</sup>                                                                                                                                                                                            | This study          |
| AL838                   | FW213 <i>srtB::emr::pAL829</i> ; Em <sup>r</sup> , Kan <sup>r</sup>                                                                                                                                                       | This study          |
| AL839                   | FW213 <i>srtB::emr::pAL831</i> ; Em <sup>r</sup> , Kan <sup>r</sup>                                                                                                                                                       | This study          |
| <i>S. gordonii</i>      |                                                                                                                                                                                                                           |                     |
| Challis                 | <i>S. gordonii</i> parent strain                                                                                                                                                                                          | <sup>11</sup>       |



|             |                                                                                  |               |
|-------------|----------------------------------------------------------------------------------|---------------|
| AL825       | Challis <i>srtB</i> :: <i>aphA3</i> ; Kan <sup>r</sup>                           | This study    |
| AL827       | Challis <i>srtB</i> :: <i>aphA3</i> ::pAL826; Kan <sup>r</sup> , Em <sup>r</sup> | This study    |
| AL831       | Challis <i>srtB</i> :: <i>aphA3</i> ::pAL830; Kan <sup>r</sup> , Em <sup>r</sup> | This study    |
| Plasmids    |                                                                                  |               |
| pGEM-T      | Commercial TA cloning vector                                                     | Promega       |
| pVPT-gfp    | <i>E. coli</i> & <i>Streptococcus</i> shuttle vector                             | <sup>8</sup>  |
| pDL276      | <i>E. coli</i> & <i>Streptococcus</i> shuttle vector                             | <sup>12</sup> |
| pET28a-sumo | <i>E. coli</i> expression vector with a SUMO tag                                 | <sup>13</sup> |
| pSU21       | <i>E. coli</i> cloning vector                                                    | <sup>7</sup>  |
| pAL820      | pGEM- <i>abpA-aphA3</i>                                                          | This study    |
| pAL822      | pVPT- <i>abpA</i>                                                                | This study    |
| pBYL16      | pSU21- <i>srtA-emr</i>                                                           | This study    |
| pBYL17      | pSU21- <i>srtB-emr</i>                                                           | This study    |
| pBYL37      | pDL276- <i>srtB</i>                                                              | This study    |
| pAL824      | pGEM- <i>srtB(g)</i> <sup>a</sup> - <i>aphA3</i>                                 | This study    |
| pAL826      | pVPT- <i>srtB(g)</i>                                                             | This study    |
| pAL828      | pDL276- <i>srtB(g)</i>                                                           | This study    |
| pAL829      | pDL276- <i>srtB(c)</i>                                                           | This study    |
| pAL830      | pVPT- <i>srtB</i>                                                                | This study    |
| pAL831      | pDL276- <i>srtB(t)</i>                                                           | This study    |
| pAL832      | pET28a- <i>abpA</i>                                                              | This study    |
| pAL833      | pET28a-sumo- <i>srtB</i>                                                         | This study    |
| pAL834      | pVPT- <i>abpA-gfp</i>                                                            | This study    |
| pAL840      | pET28a-sumo- <i>abpAΔC10aa</i>                                                   | <sup>9</sup>  |
| pAL841      | pET28a-sumo- <i>abpA(24-138aa)</i>                                               | This study    |
| pAL842      | pET28a-sumo- <i>abpA(139-207aa)</i>                                              | This study    |
| pAL843      | pET28a-sumo- <i>abpA-KK37/38A</i>                                                | This study    |
| pAL844      | pET28a-sumo- <i>abpA-YY132/133A</i>                                              | This study    |
| pAL845      | pET28a-sumo- <i>abpA-VL117/118A</i>                                              | This study    |
| pAL846      | pET28a- <i>srtB</i>                                                              | This study    |

1 <sup>a</sup>g means this gene comes from *S. gordonii* CH1, c means this gene comes

2 from *S. aureus* Col, t means this gene comes from *S. pneumoniae* Tigr4

1 **Supplementary Table S2.** Primers used in this study

| Primer             | Sequence <sup>b</sup>                                     |
|--------------------|-----------------------------------------------------------|
| abpA-F1            | GGGCACGTAAGTTAGCTGAGTT                                    |
| abpA-R1            | TGAATCAGGGATTTGACGAAGATAAAGGT                             |
| abpA-F2            | CCTGAATTCCAATACAGGTGCTGCTGCAGCAAATACTGCAAGAGCTG           |
| abpA-R2            | CTCGAATTCGTTGACAAAGACGGTAAAACAG                           |
| abpA-F3            | ATCGTTCGACATGAAAAAAGTTTTATTATCATCAGTAGC                   |
| abpA-R3            | CATGGTACCAAATTATTTAACTGCGCTTGTTTTGGA                      |
| abpA-F4            | GCACCATGGCTATGAAAAAAGTTTTATTATCATCAGTAG                   |
| abpA-R4            | ATACTCGAGTTTAACTGCGCTTGTT                                 |
| abpA-del1          | CATGGTACCAAATTAACCAGCTTTAGCATCAGCC                        |
| abpA-del2          | CATGGTACCAAATTAAGCTTTACCAGCTTTAGC                         |
| abpA-del3          | CATGGTACCAAATTAGCTTGTTTTGGAAGAGC                          |
| abpA-L/N           | CATGGTACCAAATTATTTAACTGCGCTTGTTTTGGATTAGCTTTACCAG         |
| abpA-L/R           | CATGGTACCAAATTATTTAACTGCGCTTGTTTTGGACGAGCTTTACCAG         |
| abpA-P/A           | CATGGTACCAAATTATTTAACTGCGCTTGTTTTAGCAAGAGCTTTACCAG        |
| abpA-P/D           | CATGGTACCAAATTATTTAACTGCGCTTGTTTCATCAAGAGCTTTACCAG        |
| abpA-K/E           | CATGGTACCAAATTATTTAACTGCGCTTGTTCTGGAAGAGCTTTACCAG         |
| abpA-K/L           | CATGGTACCAAATTATTTAACTGCGCTTGTTAGTGGAAGAGCTTTACCAG        |
| abpA-T/A           | CATGGTACCAAATTATTTAACTGCGCTTGCTTCTGGAAGAGCTTTACCAG        |
| abpA-T/S           | CATGGTACCAAATTATTTAACTGCGCTTGATTTTGGGAAGAGCTTTACCAG       |
| abpA-S/W           | CATGGTACCAAATTATTTAACTGCCCATGTTTTTGGGAAGAGCTTTAC          |
| abpA-S/G           | CATGGTACCAAATTATTTAACTGCCCTGTTTTTGGGAAGAGCTTTAC           |
| abpA-S/R           | CATGGTACCAAATTATTTAACTGCCCTTGTTTTTGGGAAGAGCTTTAC          |
| abpA-K37/38A F     | CTGCTGCATCACGCCATGAAACATATGCCGCTTGATCAATTGGTTAGATGCACTTG  |
| abpA-K37/38A R     | CAAGTGCATCTAACCAATTGATCCAAGCGGCATATGTTTCATGGCGTGATGCAGCAG |
| abpA-H56AF         | CTTCTTTGATTTCTGCTTCAGCAGCTGCTACTTGAGTGTTAGCTT             |
| abpA-H56AR         | AAGCTAACACTCAAGTAGCAGCTGCTGAAGCAGAAATCAAAGAAG             |
| abpA-Y114A F       | ATTTTTGTTGAAGAACTTGGATGGCACGGTTGCGAACTGTGTTGTATG          |
| abpA-Y114A R       | CATACAACACAGTTCGCAACCGTGCCATCCAAGTTCCTCAACAAAAAT          |
| abpA-VL117/118AA F | GCAGCTTCAATGTATTTTTGTTGAGCAGCTTGATGTAACGGTTGCGAACTG       |
| abpA-VL117/118AAR  | CAGTTCGCAACCGTTACATCCAAGCTGCTCAACAAAAATACATTGAAGCTGC      |
| abpA-Y132/133AF    | TTAGCTTCTACAGCTGTTTCATCGGCGGCGTTACCTTGAGCTTTAGCAGCTTC     |
| abpA-Y132/133AR    | GAAGCTGCTAAAGCTCAAGGTAACGCCGCGATGAAACAGCTGTAGAAGCTAA      |
| abpA-V138A F       | CATTTGTACGGTTAGCTTCTGCAGCTGTTTCATCGTAGTAG                 |
| abpA-V138A R       | CTACTACGATGAAACAGCTGCAGAAGCTAACCGTACAAATG                 |
| AbpA-138aaR        | ATGCCTCGAG TACAGCTGTTTCATCGTAGTAG                         |
| AbpA-24aaF         | ATGCGGATCCCAAGGTGAAAACCCAAGTG                             |

|             |                                           |
|-------------|-------------------------------------------|
| AbpA-139aaF | ATGC <u>GGATCC</u> GAAGCTAACCGTACAAATGAA  |
| abpA-207aaR | GACAC <u>CTCGAG</u> TATTAACTGCGCTTG       |
| srtA-F1     | GTCAAACGGACCAATGTAG                       |
| srtA-R1     | CGTACATAATTTCTCCTCAC                      |
| srtB-F1     | GCACCTGTATTTGCACAAGG                      |
| srtB-R1     | CTTCGTTTGCCCATCTTCG                       |
| srtA-F2     | TGGGGG <u>GAGATCT</u> ATCTTCTAGCACAGCT    |
| srtA-R2     | TTTCTCAGC <u>AGATCT</u> CATTTCAATTGAT     |
| srtB-F2     | CTCGAC <u>GGATCC</u> CGTCATCAATGCCC       |
| srtB-R2     | GCAACGATGTTGAGGATCCTATTGCGTAAAC           |
| srtB-F3     | TTT <u>GAGCTCT</u> AATTAGCTCGAAACGAATATCA |
| srtB-R3     | TTAGCATGCATTTCTTACAAATACTAGACATA          |
| srtB-F4     | ATAC <u>GTTCGAC</u> ATGAAAAGAGCTGAGA      |
| srtB-R4     | CTA <u>AGGATCCT</u> TGTTGACCACGTGTT       |
| srtB-F5     | ATCGGATCCATGAAAAGAGCTGAGA                 |
| srtB-R5     | AATCTCGAGTTATTATTGTTGACCA                 |
| srtB-F1g c  | AGTTTTATTGTCAAGCGTG                       |
| srtA-R1g    | ATAAACAATCCAGCGC                          |
| srtB-F2g    | ATCGGATCCTCTTATTTGGAGCCTT                 |
| srtB-R2g    | CATGGATCCATGGGCTTGTTATTG                  |
| srtB-F3g    | ACCGT <u>TCGAC</u> ATGAGTCAAATGCTA        |
| srtB-R3g    | TCAGGGGATCCCTATCTAGTAGGAGTATAT            |
| srtB-F4g    | AGTGCATGCGATGAGTCAAATGCTA                 |
| srtB-R4g    | TCTGAATTCCTATCTAGTAGGAGTA                 |
| srtB -F1c   | ATTGCATGCAGATGAGAATGAAGCGATTTTT           |
| srtB-R1c    | ACTGAATTCCTAACTTACCTTAATTATTTTTG          |
| srtB -F2c   | AGTGGATCCATGAGAATGAAGCGATTTTT             |
| srtB-R2c    | GATGAGCTCTTATTAACCTTACCTTAATTATTTTTG      |
| srtB-F1t    | ATTGCATGCAGATGGCGGTAATGGCGTATCC           |
| srtB-R1t    | ACTGAATTCCTACTGTTGTCCATCCTCCACCT          |
| srtB-F2t    | AGTGGATCCATGGCGGTAATGGCGTATCC             |
| srtB-R2t    | GATGAGCTCTTATTACTGTTGTCCATCCTCCACCT       |

- 1     <sup>a</sup>     Restriction sites are underlined.
- 2     <sup>b</sup>     g stands for *S. gordonii* CH1, c for *S. aureus* COL, t for *S. pneumoniae*
- 3     Tigr4
- 4
- 5

1

**Supplementary Table S3.**

2

Summary of mutagenesis at the C-terminal domain of AbpA.

| <b>Mutations</b> | <b>Sequences</b>        | <b>Description</b>      | <b>Amylase binding</b> |
|------------------|-------------------------|-------------------------|------------------------|
| WT               | KAGKALPKTSAVK           |                         | +                      |
| Del1(205-207)    | KAGKALPKTS              |                         | -                      |
| Del2(200-207)    | KAGKA                   |                         | -                      |
| Del3(195-207)    | -                       |                         | -                      |
| 200L/N           | KAGKAN <u>P</u> PKTSAVK | Hydrophobic/uncharged   | -                      |
| 200L/R           | KAGKAR <u>P</u> PKTSAVK | Hydrophobic/Hydrophilic | -                      |
| 201P/A           | KAGKAL <u>A</u> KTSAVK  | Hydrophobic/Hydrophobic | -                      |
| 201P/D           | KAGKAL <u>D</u> KTSAVK  | Hydrophobic/Hydrophilic | -                      |
| 202K/E           | KAGKALP <u>E</u> TSAVK  | Hydrophilic/Hydrophilic | +                      |
| 202K/L           | KAGKALP <u>L</u> TSAVK  | Hydrophilic/Hydrophobic | -                      |
| 203T/A           | KAGKALPK <u>A</u> SAVK  | Uncharged/Hydrophobic   | -                      |
| 203T/S           | KAGKALPK <u>S</u> SAVK  | Uncharged/Uncharged     | -                      |
| 204S/W           | KAGKALPKT <u>W</u> AVK  | Uncharged/Hydrophobic   | +                      |
| 204S/G           | KAGKALPKT <u>G</u> AVK  | Uncharged/Hydrophobic   | +                      |
| 204S/R           | KAGKALPKT <u>R</u> AVK  | Uncharged/Hydrophilic   | +                      |

3

4

## References

- 1 Wu, H., Zeng, M. & Fives-Taylor, P. The glycan moieties and the N-terminal polypeptide backbone of a fimbria-associated adhesin, Fap1, play distinct roles in the biofilm development of *Streptococcus parasanguinis*. *Infect Immun* **75**, 2181-2188 (2007).
- 2 J. Sambrook, E.F. Fritsch & T. Maniatis. *Molecular cloning: a laboratory manual*. Vol. 2 (Cold Spring Harbor Laboratory Press, 1989).
- 3 Fenno, J. C., Shaikh, A. & Fives-Taylor, P. Characterization of allelic replacement in *Streptococcus parasanguis*: transformation and homologous recombination in a 'nontransformable' streptococcus. *Gene* **130**, 81-90 (1993).
- 4 Petersen, F. C. & Scheie, A. A. Natural transformation of oral streptococci. *Methods Mol Biol* **666**, 167-180 (2010).
- 5 Kremer, B. H. *et al.* Characterization of the sat operon in *Streptococcus mutans*: evidence for a role of Ffh in acid tolerance. *Journal of bacteriology* **183**, 2543-2552, doi:10.1128/jb.183.8.2543-2552.2001 (2001).
- 6 Zhou, M., Fives-Taylor, P. & Wu, H. The utility of affinity-tags for detection of a streptococcal protein from a variety of streptococcal species. *Journal of microbiological methods* **72**, 249-256, doi:10.1016/j.mimet.2007.12.002 (2008).
- 7 Bartolome, B., Jubete, Y., Martinez, E. & de la Cruz, F. Construction and properties of a family of pACYC184-derived cloning vectors compatible with pBR322 and its derivatives. *Gene* **102**, 75-78 (1991).
- 8 Zhou, M., Fives-Taylor, P. & Wu, H. The utility of affinity-tags for detection of a streptococcal protein from a variety of streptococcal species. *J Microbiol Methods* **72**, 249-256 (2008).
- 9 Liu, B., Zhu, F., Wu, H. & Matthews, S. NMR assignment of the amylase-binding protein A from *Streptococcus parasanguinis*. *Biomolecular NMR assignments* **9**, 173-175, doi:10.1007/s12104-014-9568-9 (2015).
- 10 Cole, R. M., Calandra, G. B., Huff, E. & Nugent, K. M. Attributes of potential utility in differentiating among "group H" streptococci or *Streptococcus sanguis*. *J Dent Res* **55**, A142-153 (1976).
- 11 Rogers, J. D. *et al.* Identification and analysis of a gene (abpA) encoding a major amylase-binding protein in *Streptococcus gordonii*. *Microbiology* **144** ( Pt 5), 1223-1233 (1998).
- 12 Dunny, G. M., Lee, L. N. & LeBlanc, D. J. Improved electroporation and cloning vector system for gram-positive bacteria. *Appl Environ Microbiol* **57**, 1194-1201 (1991).
- 13 Zhu, F. *et al.* Structural and functional analysis of a new subfamily of glycosyltransferases required for glycosylation of serine-rich streptococcal adhesins. *The Journal of biological chemistry* **286**, 27048-27057, doi:10.1074/jbc.M110.208629 (2011).

**A**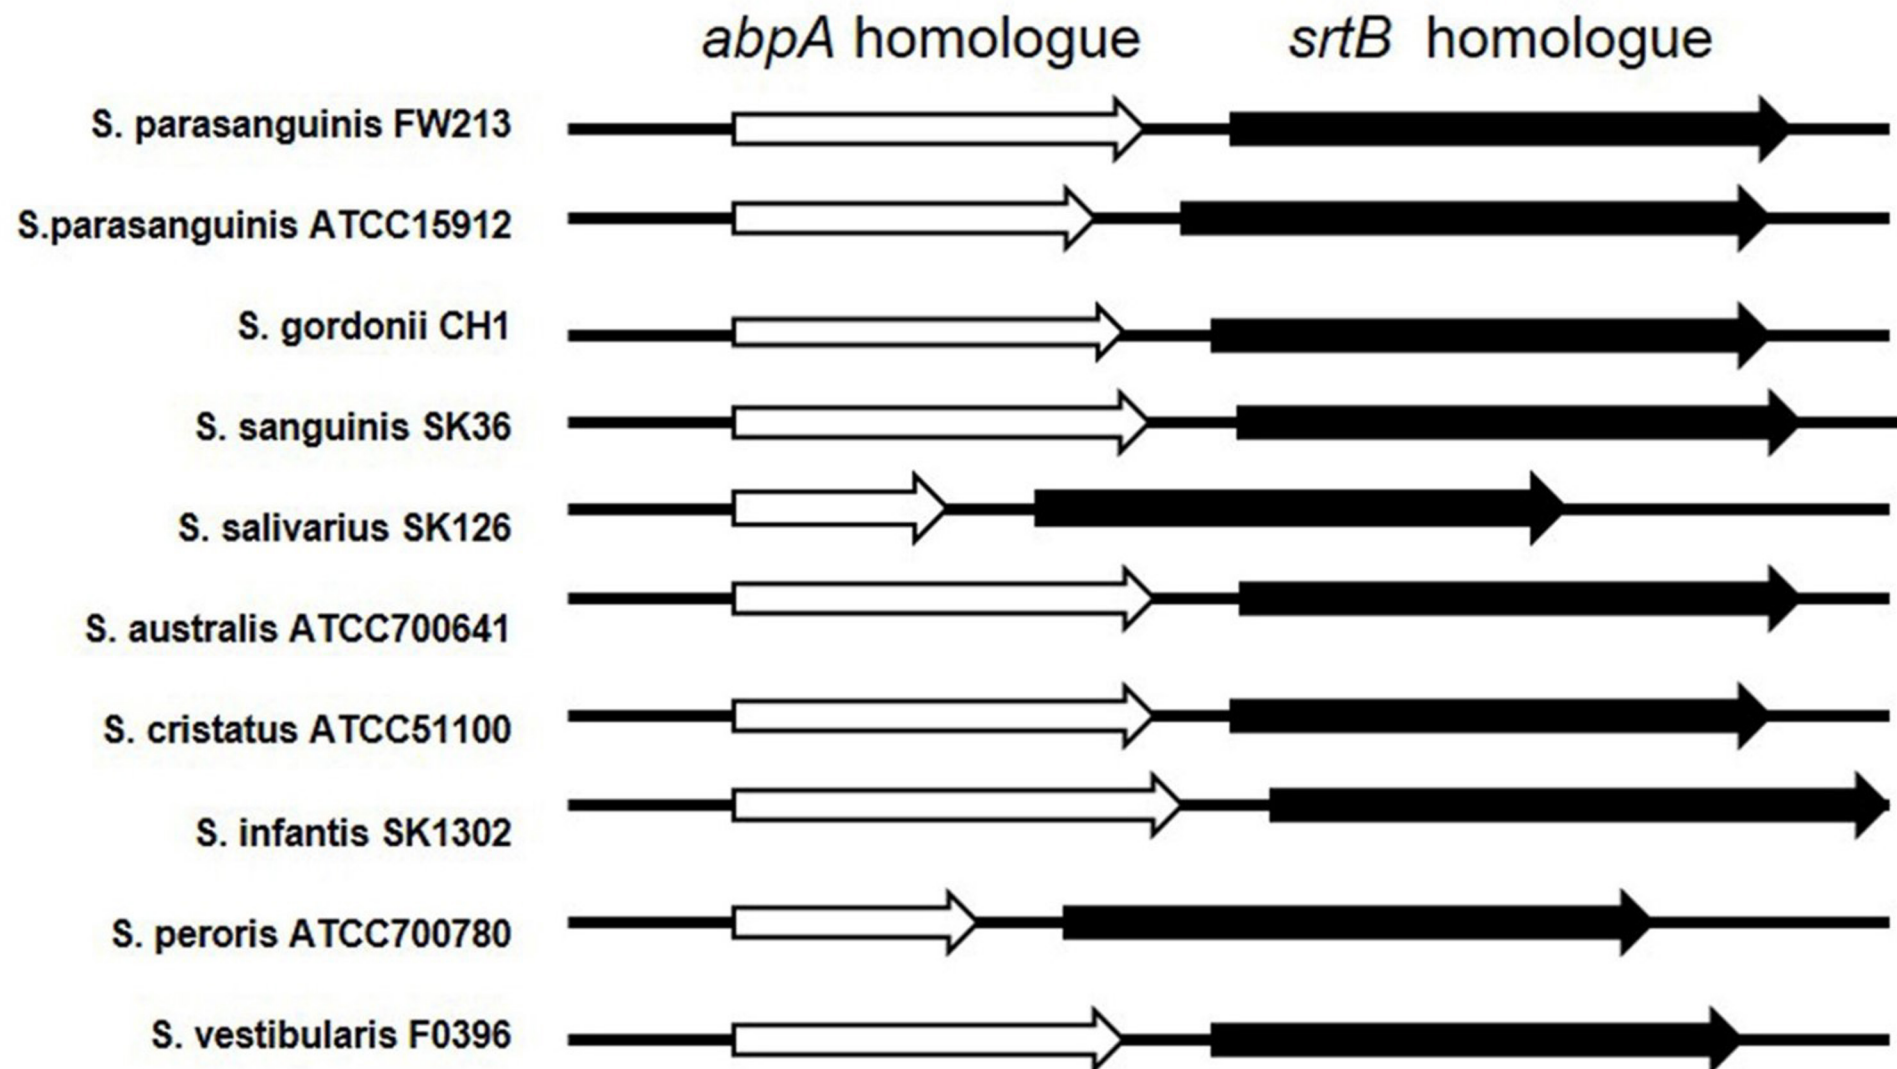

B

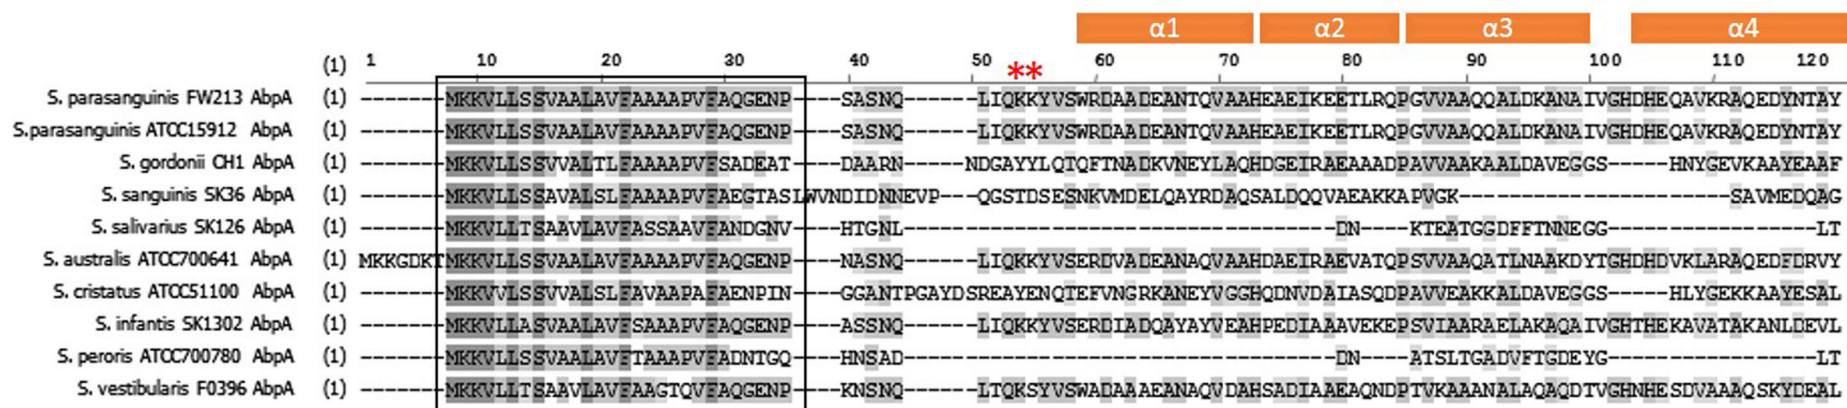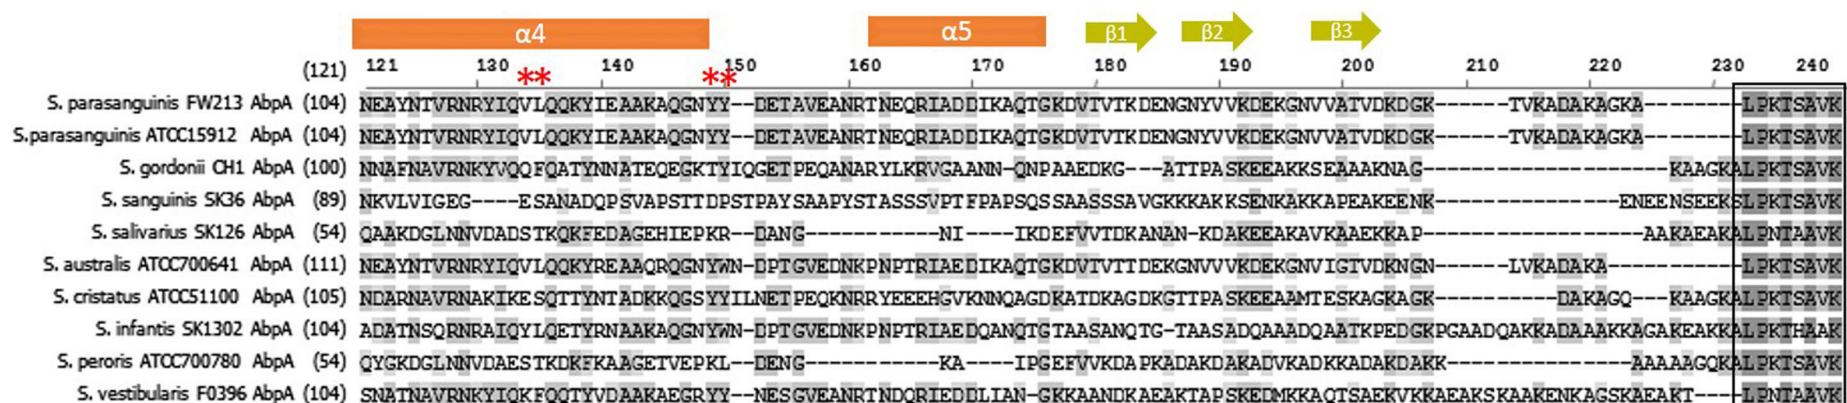

C

|              |                    |          |
|--------------|--------------------|----------|
| <b>LPXTG</b> | Hydrophobic domain | <b>+</b> |
|--------------|--------------------|----------|

Classic CWSS

|              |            |
|--------------|------------|
| <b>LPKTS</b> | <b>AVK</b> |
|--------------|------------|

C terminus of AbpA





**A**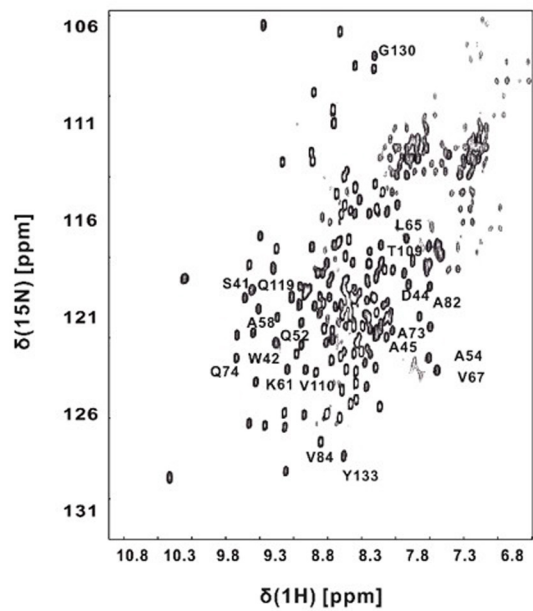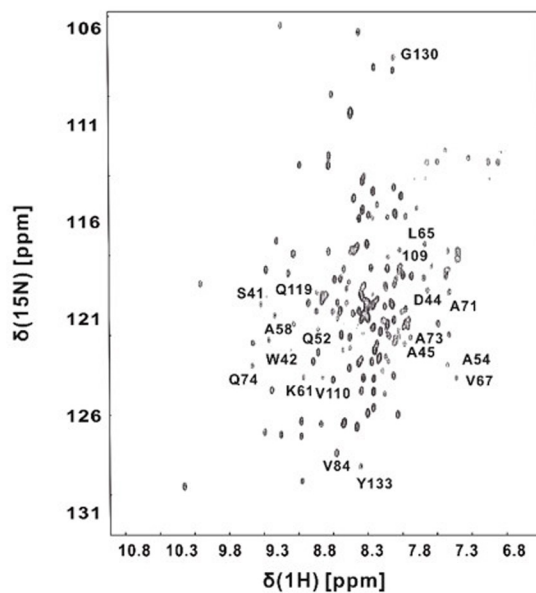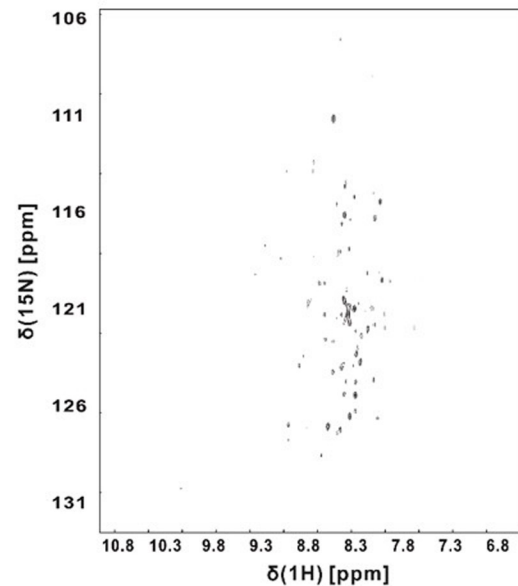**B**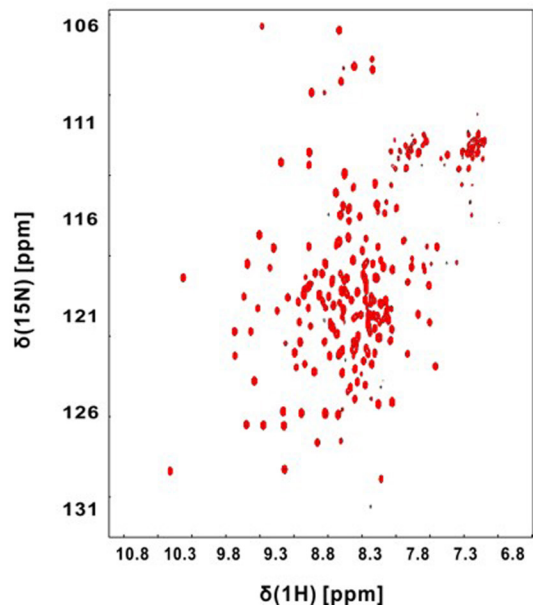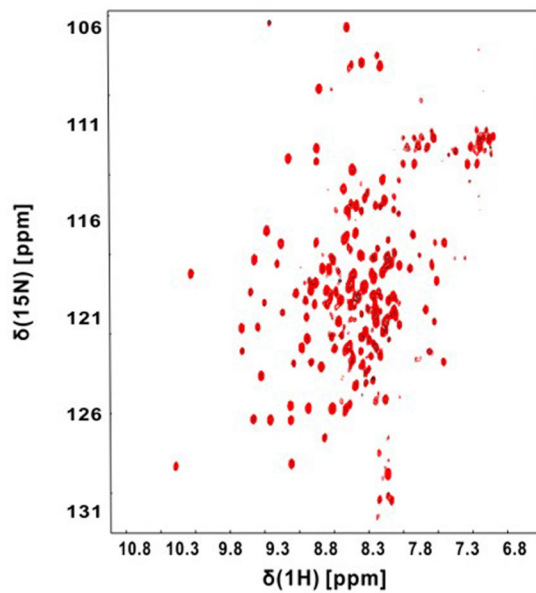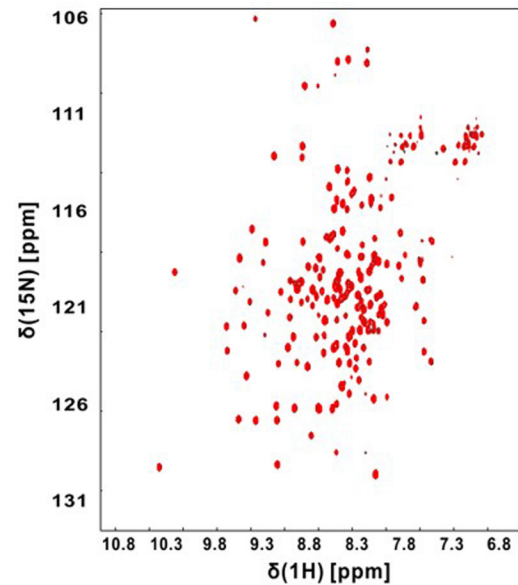

Supplement: srep30966-s1.pdf [file srep30966-s1.pdf]
